# Supplementary material
Source: publisher figshare collection journal article supplement (https://karger.figshare.com/ndownloader/files/7580515)
Supplement: Supplementary file 1 [file 7580515]

## Sheet: mature miRNAs
Table S5A. Reads and sequences of mature miRNAs in all of the samples
miRNA name	miRNA family	mature sequence	Raw reads			Normalized reads(TPM)
			female	intersex	male	female	intersex	male
maL-Let-7a	Let-7	ugagguaguagguuguauaguu	163890	115313	288655	66927.3	68147.3	74676.1
maL-Let-7b	Let-7	ugagguaguagguugugugguu	20471	17346	34602	8359.68	10251.1	8951.66
maL-Let-7c	Let-7	ugagguaguagguuguaugguu	160800	118849	279676	65665.4	70237	72353.2
maL-Let-7d	Let-7	ugagguaguugguuguaugguu	28361	24329	43260	11581.7	14377.9	11191.5
maL-Let-7e	Let-7	ugagguaguagauugaauaguu	32681	24407	48900	13345.8	14424	12650.6
maL-Let-7f	Let-7	ugagguaguagauuguauaguu	159872	113169	268790	65286.5	66880.3	69536.9
maL-Let-7g	Let-7	ugagguaguaguuuguauaguu	145725	101753	251776	59509.3	60133.7	65135.3
maL-Let-7h	Let-7	ugagguaguaaguuguguuguu	5941	4786	8605	2426.11	2828.42	2226.14
maL-Let-7i	Let-7	ugagguaguaguuugugcuguu	19727	12751	15640	8055.86	7535.55	4046.12
maL-Let-7j	Let-7	ugagguaguuguuuguacaguu	4228	2188	4446	1726.58	1293.06	1150.2
mal-miR-1	miR-1	uggaauguaaagaaguauguau	48	20	135	19.6016	11.8195	34.925
mal-miR-100	miR-100	aacccguagauccgaacuugug	48116	29711	76306	19649	17558.5	19740.6
mal-miR-101a	miR-101	uacaguacugugauaacugaag	12801	12135	19056	5227.51	7171.51	4929.86
mal-miR-101b	miR-101	uacaguacuaugauaacugaa	3221	2302	3202	1315.35	1360.43	828.369
mal-miR-103	miR-103	agcagcauuguacagggcuauga	10694	7835	9813	4367.08	4630.31	2538.66
mal-miR-107	miR-107	agcagcauuguacagggcuau	9502	6727	8627	3880.3	3975.5	2231.84
mal-miR-10a	miR-10	uacccuguagauccgaauuugu	9832	4405	13463	4015.07	2603.25	3482.93
mal-miR-10b	miR-10	uacccuguagaaccgaauuugu	73088	54883	168695	29846.7	32434.6	43642
mal-miR-10c	miR-10	uacccuguagauccggauuugu	72375	30796	67054	29555.6	18199.7	17347.1
mal-miR-10d	miR-10	uacccuguagaaccgaaugugu	23282	5568	10440	9507.6	3290.56	2700.87
mal-miR-122	miR-122	uggagugugacaaugguguuug	10060	4642	8545	4108.17	2743.32	2210.62
mal-miR-124	miR-124	uaaggcacgcggugaaugcc	4229	4002	6566	1726.98	2365.09	1698.65
mal-miR-125a	miR-125	ucccugagacccuuaaccugug	36174	20664	21126	14772.3	12212	5465.37
mal-miR-125b	miR-125	ucccugagacccuaacuuguga	17077	12289	10526	6973.69	7262.52	2723.11
mal-miR-126a	miR-126	ucguaccgugaguaauaaugc	9366	6568	14343	3824.77	3881.54	3710.59
mal-miR-128	miR-128	ucacagugaaccggucucuuu	34405	31057	27910	14049.9	18354	7220.42
mal-miR-129	miR-129	cuuuuugcggucugggcuugc	2240	2489	2788	914.742	1470.94	721.266
mal-miR-130a	miR-130	cagugcaauguuaaaagggcau	0	0	15	0.00408367	0.00590977	3.88055
mal-miR-130b	miR-130	cagugcaauaaugaaagggcau	835	590	823	340.987	348.676	212.913
mal-miR-130c	miR-130	cagugcaauauuaaaagggcau	1951	1265	2171	796.724	747.586	561.645
mal-miR-132	miR-132	uaacagucuacagccauggucg	2579	2097	2367	1053.18	1239.28	612.351
mal-miR-133a	miR-133	uugguccccuucaaccagcugu	1574	834	2586	642.77	492.875	669.007
mal-miR-133c	miR-133	uuuggucccuuucaaccagcu	69	46	179	28.1773	27.1849	46.3079
mal-miR-135a	miR-135	uauggcuuuuuauuccuauguga	525	464	502	214.393	274.213	129.869
mal-miR-135b	miR-135	uauggcuuuuuauuccuaucug	7647	6352	15789	3122.78	3753.89	4084.67
mal-miR-135c	miR-135	uauggcuuucuauuccuaugug	1662	1341	1717	678.706	792.5	444.194
mal-miR-137	miR-137	uuauugcuuaagaauacgcgu	1153	1030	1652	470.847	608.706	427.378
mal-miR-138	miR-138	agcugguguugugaaucaggccg	11772	8395	4360	4807.3	4961.25	1127.95
mal-miR-139	miR-139	ucuacagugcaugugucuccagu	2011	1619	1380	821.226	956.792	357.011
mal-miR-140	miR-140	cagugguuuuacccuaugguag	83	47	138	33.8945	27.7759	35.7011
mal-miR-141	miR-141	uaacacugucugguaacgaugc	6	2	21	2.4502	1.18195	5.43277
mal-miR-142a	miR-142	cauaaaguagCaagcacuacu	136	67	237	55.5379	39.5955	61.3127
mal-miR-143	miR-143	ugagaugaagcacuguagcuc	154862	123377	730747	63240.5	72913	189047
mal-miR-144	miR-144	cuacaguauagaugauguacu	841	435	779	343.437	257.075	201.53
mal-miR-145	miR-145	guccaguuuucccaggaaucccu	3514	5948	12744	1435	3515.13	3296.92
mal-miR-146a	miR-146	ugagaacugaauuccauagaugg	18876	10163	68223	7708.34	6006.1	17649.5
mal-miR-150	miR-150	ucucccaauccuuguaccagug	877	531	977	358.138	313.809	252.753
mal-miR-152	miR-152	ucagugcaugacagaacuuug	1636	1285	2674	668.089	759.406	691.773
mal-miR-153a	miR-153	uugcauagucacaaaagugauc	13621	11673	32818	5562.37	6898.48	8490.13
mal-miR-153b	miR-153	uugcauagucacaaaaaugagc	2825	2817	5390	1153.64	1664.78	1394.41
mal-miR-153c	miR-153	uugcauagucacaaaaaugauc	2674	2124	6100	1091.97	1255.24	1578.09
mal-miR-155	miR-155	uuaaugcuaaucgugauaggggu	529	185	159	216.026	109.331	41.1339
mal-miR-15a	miR-15	uagcagcacGgaaugguuugu	1279	759	1471	522.302	448.552	380.553
mal-miR-15b	miR-15	uagcagcacaucaugguuug	658	305	478	268.706	180.248	123.66
mal-miR-16a	miR-16	uagcagcacguaaauauuggug	509	294	800	207.859	173.747	206.963
mal-miR-16b	miR-16	uagcagcacguaaauauuggag	4074	2736	4423	1663.69	1616.91	1144.25
mal-miR-16c	miR-16	uagcagcauguaaauauuggagu	3	7	20	1.2251	4.13684	5.17407
mal-miR-17a	miR-17	caaagugcuuacagugcaggua	800	704	1204	326.694	416.048	311.479
mal-miR-181a	miR-181	aacauucaacgcugucggugag	271759	182587	268839	110977	107905	69549.6
mal-miR-181b	miR-181	aacauucauugcugucgguggg	23864	14957	15924	9745.27	8839.24	4119.6
mal-miR-181c	miR-181	cacauucauCgcugucgguggg	500	318	585	204.184	187.931	151.342
mal-miR-182	miR-182	uuuggcaaugguagaacucaca	9779	6950	18065	3993.42	4107.29	4673.48
mal-miR-183	miR-183	uauggcacugguagaauucacu	2081	1541	4835	849.812	910.696	1250.83
mal-miR-184	miR-184	uggacggagaacugauaagggc	144	110	586	58.8049	65.0075	151.6
mal-miR-187	miR-187	ucgugucuuguguugcagccagu	592	484	663	241.753	286.033	171.52
mal-miR-18a	miR-18	uaaggugcaucuagugcagaua	201	155	225	82.0818	91.6014	58.2083
mal-miR-18c	miR-18	uaaggugcaucuuguguaguua	0	0	12	0.00408367	0.00590977	3.10444
mal-miR-190a	miR-190	ugauauguuugauauauuagguug	353	384	809	144.154	226.935	209.291
mal-miR-190b	miR-190	ugauauguuugauauucgguug	50	7	46	20.4184	4.13684	11.9004
mal-miR-192	miR-192	augaccuaugaauugacagcc	9875	3586	8093	4032.63	2119.24	2093.69
mal-miR-194a	miR-194	uguaacagcaacuccaugugga	483	288	336	197.241	170.201	86.9244
mal-miR-196a	miR-196	uagguaguuucauguuguuggga	322	496	951	131.494	293.125	246.027
mal-miR-196b	miR-196	uagguaguuucaaguuguugggc	56	23	44	22.8686	13.5925	11.383
mal-miR-199	miR-199	cccaguguucagacuaccug	3235	2005	3842	1321.07	1184.91	993.939
mal-miR-19a	miR-19	ugugcaaaucuaugcaaaacug	753	1081	1680	307.5	638.846	434.622
mal-miR-19b	miR-19	ugugcaaauccaugcaaaacug	3377	4856	7090	1379.06	2869.78	1834.21
mal-miR-19d	miR-19	ugugcaaacccaugcaaaacug	1312	1903	2892	535.778	1124.63	748.171
mal-miR-200a	miR-200	uaacacugucugguaacgaugu	1765	1287	2124	720.768	760.587	549.486
mal-miR-200b	miR-200	uaauacugccugguaaugauga	475	367	672	193.974	216.889	173.849
mal-miR-202	miR-202	agaggcauagggcaugggaaa	41	80	198	16.7431	47.2782	51.2233
mal-miR-203a	miR-203	gugaaauguuuaggaccacuug	166	110	215	67.7889	65.0075	55.6213
mal-miR-203b	miR-203	gugaaauguucaggaccacuug	3	12	162	1.2251	7.09172	41.91
mal-miR-204	miR-204	uucccuuugucauccuaugccu	5775	5035	12871	2358.32	2975.57	3329.77
mal-miR-205	miR-205	uccuucauuccaccggagucug	65	143	149	26.5439	84.5097	38.5468
mal-miR-206	miR-206	uggaauguaaggaagugugugg	5	1	49	2.04184	0.590977	12.6765
mal-miR-20a	miR-20	uaaagugcuuauagugcagguag	515	523	737	210.309	309.081	190.665
mal-miR-20b	miR-20	uaaagugcuuaCagugcagguag	212	161	327	86.5738	95.1473	84.5961
mal-miR-21	miR-21	uagcuuaucagacugguguugg	81364	48245	85214	33226.4	28511.7	22045.2
mal-miR-210	miR-210	cugugcgugugacagcggcua	1515	498	526	618.676	294.307	136.078
mal-miR-212	miR-212	uaacagucuacagucauggcu	10188	6926	8673	4160.44	4093.11	2243.74
mal-miR-214	miR-214	acagcaggcacagacaggcaga	630	477	1241	257.271	281.896	321.051
mal-miR-216a	miR-216	Aaaucucagcuggcaacuguga	81	23	107	33.0777	13.5925	27.6813
mal-miR-216b	miR-216	uaaucucugcaggcaacuguga	809	316	817	330.369	186.749	211.361
mal-miR-217	miR-217	uacugcaucaggaacugauugga	380	209	494	155.18	123.514	127.8
mal-miR-2184	miR-2184	aacaguaagaguuuaugugcug	3491	2471	5667	1425.61	1460.3	1466.07
mal-miR-2187	miR-2187	uuuacaggcuaugcuaaucuau	95	73	232	38.7949	43.1413	60.0192
mal-miR-2188	miR-2188	aagguccaaccucacauguccu	5310	6472	4240	2168.43	3824.8	1096.9
mal-miR-218a	miR-218	uugugcuugaucuaaccaugug	1287	572	1209	525.568	338.039	312.773
mal-miR-218b	miR-218	uugugcuugaucuaaccaugca	216	49	213	88.2073	28.9579	55.1039
mal-miR-219	miR-219	ugauuguccaaacgcaauucuu	1579	668	2041	644.812	394.773	528.014
mal-miR-221	miR-221	agcuacauugucugcuggguuu	23433	29381	26438	9569.27	17363.5	6839.6
mal-miR-222a	miR-222	agcuacaucuggcuacugggucu	7501	11533	11840	3063.16	6815.74	3063.05
mal-miR-223	miR-223	ugucaguuugucaaauacccca	697	327	498	284.632	193.249	128.834
mal-miR-22a	miR-22	aagcugccagcugaagaacugu	42309	29492	47671	17277.6	17429.1	12332.7
mal-miR-22b	miR-22	aagcugccaguugaagagcugu	2737	1467	1892	1117.7	866.963	489.467
mal-miR-23a	miR-23	aucacauugccagggauuucc	856	766	1617	349.562	452.688	418.324
mal-miR-23b	miR-23	aucacauugccagggauuacc	878	998	1654	358.546	589.795	427.896
mal-miR-24	miR-24	uggcucaguucagcaggaac	732	609	2851	298.925	359.905	737.564
mal-miR-25	miR-25	cauugcacuugucucggCcug	30	22	32	12.251	13.0015	8.27851
mal-miR-26a	miR-26	uucaaguaauccaggauaggcu	90347	68819	170317	36894.7	40670.5	44061.6
mal-miR-26b	miR-26	uucaaguaauccaggauagguu	6782	5008	16779	2769.55	2959.61	4340.79
mal-miR-27a	miR-27	uucacaguggcuaaguuccgcu	466	235	323	190.299	138.88	83.5613
mal-miR-27b	miR-27	uucacaguggcuaaguucugca	53445	26981	48530	21825.2	15945.2	12554.9
mal-miR-27c	miR-27	uucacagugguuaaguucugc	41010	18284	49291	16747.1	10805.4	12751.8
mal-miR-27d	miR-27	uucacaguggcuaaguucuuca	1000	390	733	408.367	230.481	189.63
mal-miR-27e	miR-27	uucacaguggcuaaguucagug	574	301	763	234.403	177.884	197.391
mal-miR-29a	miR-29	uagcaccauuugaaaucgguua	3746	2305	3144	1529.74	1362.2	813.364
mal-miR-29b	miR-29	uagcaccauuugaaaucagug	646	528	859	263.805	312.036	222.226
mal-miR-301a	miR-301	cagugcaauaguauugucaaagc	110	121	363	44.9204	71.5082	93.9094
mal-miR-301c	miR-301	cagugcaauaguauugucauagc	315	261	706	128.636	154.245	182.645
mal-miR-30a	miR-30	uguaaacauucccgacuggaag	2	2	9	0.816734	1.18195	2.32833
mal-miR-30b	miR-30	uguaaacauccuacacucagcu	1608	1371	2093	656.654	810.23	541.467
mal-miR-30c	miR-30	uguaaacauccuacacucucagcu	3055	2659	6206	1247.56	1571.41	1605.51
mal-miR-30d	miR-30	uguaaacauccccgacugga	4847	3585	8113	1979.36	2118.65	2098.86
mal-miR-30e	miR-30	uguaaacauccuugacuggaagcu	8007	5981	16653	3269.8	3534.63	4308.19
mal-miR-31	miR-31	uggcaagauguuggcauagcug	215	139	144	87.7989	82.1458	37.2533
mal-miR-338	miR-338	uccagcaucagugauuuuguug	24916	14181	21908	10174.9	8380.65	5667.68
mal-miR-34	miR-34	uggcagugucuuagcugguugu	276	156	458	112.709	92.1924	118.486
mal-miR-365	miR-365	uaaugccccuaaaaauccuuau	383	228	506	156.405	134.743	130.904
mal-miR-375	miR-375	uuuguucguucggcucgcguua	2486	5124	5404	1015.2	3028.17	1398.03
mal-miR-429	miR-429	uaauacugucugguaaugccg	1519	1243	1676	620.31	734.584	433.587
mal-miR-430a	miR-430	uaagugcuauuuguugggguag	1411	641	174	576.206	378.816	45.0144
mal-miR-430b	miR-430	aaagugcuaucaaguugggguag	0	0	78	0.00408367	0.00590977	20.1789
mal-miR-430c	miR-430	uaagugcuucucuuugggguUg	1172	521	131	478.606	307.899	33.8902
mal-miR-451	miR-451	aaaccguuaccauuacugagu	58	144	34	23.6853	85.1007	8.79592
mal-miR-454a	miR-454	uagugcaauauugcuaauagggu	1	22	0	0.408367	13.0015	0.00258704
mal-miR-454b	miR-454	uagugcaauauugcuuauagggu	532	599	1407	217.251	353.995	363.996
mal-miR-455	miR-455	uaugugcccuuggacuacaucg	1385	1151	2477	565.588	680.215	640.809
mal-miR-456	miR-456	caggcugguuagaugguuguca	3503	2651	2624	1430.51	1566.68	678.838
mal-miR-458	miR-458	agcgccauuuacagagcuau	1	0	10	0.408367	0.00590977	2.58704
mal-miR-459	miR-459	ucaguaacaaggauucauccug	77	57	62	31.4443	33.6857	16.0396
mal-miR-460-5p	miR-460	ccugcauuguacacacugug	22	20	16	8.98408	11.8195	4.13926
mal-miR-462	miR-462	uaacggaacccauaaugcagcug	62582	22277	29211	25556.4	13165.2	7556.99
mal-miR-489	miR-489	gugacaucauauguacggcugc	979	1034	949	399.791	611.07	245.51
mal-miR-499	miR-499	uuaagacuugcagugauguuu	3	5	15	1.2251	2.95489	3.88055
mal-miR-551	miR-551	gcgacccauccuugguuucug	46	11	14	18.7849	6.50075	3.62185
mal-miR-722	miR-722	uuuugcagaaacguuucagauu	713	474	919	291.166	280.123	237.749
mal-miR-724	miR-724	uuaaagggaauuugcgacuguu	23145	18866	27818	9451.66	11149.4	7196.62
mal-miR-725	miR-725	uucagucauuguuucuaguagu	2	24	30	0.816734	14.1834	7.76111
mal-miR-727	miR-727	guugaggcgaguugaagacu	596	317	506	243.387	187.34	130.904
mal-miR-730	miR-730	uccucauugugcaugcugugug	359	288	234	146.604	170.201	60.5366
mal-miR-731	miR-731	aaugacacguuuucucccggauUg	12886	4721	5654	5262.22	2790	1462.71
mal-mir-737	miR-737	guuuuuuuagguuuugauuuuu	1015	942	1420	414.493	556.7	367.359
mal-miR-7a	miR-7	uggaagacuagugauuuuguug	1265	830	2858	516.584	490.511	739.375
mal-miR-9	miR-9	ucuuugguuaucuagcuguau	62645	48794	64653	25582.2	28836.1	16726
mal-miR-92a	miR-92	uauugcacuugucccggccugu	29220	20729	28230	11932.5	12250.4	7303.2
mal-miR-92b	miR-92	uauugcacucgucccggccucc	2	2	88	0.816734	1.18195	22.7659
mal-miR-93	miR-93	aaaagugcuguuugugcagguag	416	364	548	169.881	215.116	141.77
mal-miR-96	miR-96	uuuggcacuagcacauuuuugcu	119	88	214	48.5957	52.006	55.3626
mal-miR-99	miR-99	aacccguagauccgaucuugug	44854	27642	71835	18316.9	16335.8	18584

## Sheet: star miRNAs
Table S5B. Reads and sequences of miRNAs* in all of the samples
miRNA name	mature sequence	Raw reads			Normalized reads(TPM)
		female	intersex	male	female	intersex	male
mal-miR-107*	agcuucuuuacaguguugCcu	14	11	17	5.71714	6.50075	4.39796
mal-miR-10b*	acagauucgauucuaggggagu	28	7	36	11.4343	4.13684	9.31333
mal-miR-124*	ucaagguccgcugugaacacg	11	9	28	4.49204	5.31879	7.2437
mal-miR-125a*	caggugagguccuugggaac	76	62	108	31.0359	36.6406	27.94
mal-miR-125b*	acggguuaggCucuugggagcu	284	259	483	115.976	153.063	124.954
mal-miR-126a*	cauuauuacuuuugguacgcg	13322	7701	19342	5440.27	4551.11	5003.84
mal-miR-129*	aagcccuuaccccaaaaagcau	1646	1035	815	672.172	611.661	210.843
mal-miR-130a*	gcUcuuuuucuguuguacuacu	30	21	27	12.251	12.4105	6.985
mal-miR-130b*	acucuuucccuguugcacuacu	235	181	227	95.9663	106.967	58.7257
mal-miR-132*	accguggcuuuagauuguuacu	8261	5461	7519	3373.52	3227.33	1945.19
mal-miR-133a*	agcugguaaaauggaaccaaau	10	6	17	4.08367	3.54586	4.39796
mal-miR-135a*	uauagggauggaagccaugcaA	39	35	60	15.9263	20.6842	15.5222
mal-miR-1388*	aggacuguccCaccugagaau	11	4	32	4.49204	2.36391	8.27851
mal-miR-140*	uaccacaggguagaaccacgga	1119	718	1521	456.963	424.322	393.488
mal-miR-142a*	uguGguguuuccuacuuuaug	13	5	19	5.30877	2.95489	4.91537
mal-miR-143*	ggugcagugcugcaucucugguc	149	122	630	60.8467	72.0992	162.983
mal-miR-144*	ggauaucaucguauacuguaagu	2297	1326	2150	938.019	783.636	556.213
mal-miR-153a*	ucauuuuugugauguugcagcu	161	179	177	65.7471	105.785	45.7905
mal-miR-153b*	gucauuuuugugguuugcagcu	99	104	103	40.4283	61.4616	26.6465
mal-miR-181a*	accaucgaccguugauuguacc	3017	2027	3480	1232.04	1197.91	900.288
mal-miR-181b*	cucacugaucaaugaaugcaG	53	39	97	21.6435	23.0481	25.0942
mal-miR-18b*	acugcccuaagugcuccuucug	30	12	9	12.251	7.09172	2.32833
mal-miR-190a*	acuGuauaucaaacauauuccu	134	123	158	54.7212	72.6902	40.8752
mal-miR-196a*	ucugcaacAugaaacugucuua	7	11	13	2.85857	6.50075	3.36315
mal-miR-196b*	aggaaccugaaacugccugaau	21	4	7	8.57571	2.36391	1.81092
mal-miR-199*	acaguagucugcacauugguu	8064	5647	8803	3293.07	3337.25	2277.37
mal-miR-202*	uuccuaugcauauaccucuuu	1389	4138	15178	567.222	2445.46	3926.6
mal-miR-203b*	agugguucucaacaguucaaca	0	0	11	0.00408367	0.00590977	2.84574
mal-miR-20a*	acugcaAugugagcacuugaag	34	12	33	13.8845	7.09172	8.53722
mal-miR-210*	agccacugacuaacgcacauug	493	148	244	201.325	87.4646	63.1237
mal-miR-2187*	uuaauuaguauagccuguuuuag	131	141	309	53.4961	83.3278	79.9394
mal-miR-2188*	gcugugugagguCagaccuauc	36	15	19	14.7012	8.86466	4.91537
mal-miR-22a*	aguucuucacuggcaagcuuua	366	327	439	149.462	193.249	113.571
mal-miR-26b*	ccuauucuugAuuacuuguuuc	18	17	16	7.35061	10.0466	4.13926
mal-miR-27b*	agagcuuagcugauuggugaac	657	651	1494	268.297	384.726	386.503
mal-miR-27c*	aggacuuaacccacGugugaaca	192	72	149	78.4065	42.5503	38.5468
mal-miR-301b*	gcuUugacgauguugcacuacu	48	24	28	19.6016	14.1834	7.2437
mal-miR-30a*	cuuucagucugauguuugcuUc	17	13	22	6.94224	7.6827	5.69148
mal-miR-30e*	cuuucagucggauguuugcagc	1485	1306	2699	606.425	771.816	698.241
mal-miR-454b*	acccuaucaAuauugccucug	7	5	4	2.85857	2.95489	1.03481
mal-miR-455*	gcaguccaugggcauauacacu	131	87	227	53.4961	51.415	58.7257
mal-miR-727*	ucagucuucaauuccucccagc	191	111	216	77.9981	65.5985	55.88
mal-miR-9*	uucgguuaucuagcuuuauga	28024	19301	27198	11444.1	11406.4	7036.22
